# Supplementary material for: A novel “on–off–on” near-infrared fluorescent probe for Cu2+ and S2− continuous detection based on dicyanoisoflurone derivatives, and its application in bacterial imaging
Source: Royal Society of Chemistry journal article supplement (doi:10.1039/d3ay01339a), 2023-01-01
Supplement: d3ay01339a1.pdf [file d3ay01339a1.pdf]

## Supporting information

# A novel "on-off-on" near-infrared fluorescent probe for Cu<sup>2+</sup> and S<sup>2-</sup> continuous detection based on dicyanoisoflurone derivatives, and its application in bacterial imaging

Yixuan Yao,<sup>†,a</sup> Fudong Zeng,<sup>†,b</sup> Liangqiang Wu,<sup>a</sup> Shuo Xing,<sup>a</sup> Qingbiao Yang,<sup>\*,a</sup> and Yaoxian Li<sup>a</sup>

<sup>a</sup> College of Chemistry, Jilin University, Changchun 130021, P. R China

<sup>b</sup> China-Japan Union Hospital of Jilin University, Key Laboratory of Lymphatic Surgery Jilin Province, Changchun 130031, P. R China

<sup>†</sup> These two authors equally contribute to this paper.

Correspondence to: Qingbiao Yang (E-mail: [yangqb@jlu.edu.cn](mailto:yangqb@jlu.edu.cn)).

| Table of Contents                                                                                                                                        |
|----------------------------------------------------------------------------------------------------------------------------------------------------------|
| Figure S1 <sup>1</sup> H NMR spectrum of probe DL in DMSO-d <sub>6</sub> .                                                                               |
| Figure S2 <sup>13</sup> C NMR spectrum of probe DL in CDCl <sub>3</sub> .                                                                                |
| Figure S3 High-resolution mass spectra of the probe DL.                                                                                                  |
| Figure S4 High-resolution mass spectra of the probe DL+Cu <sup>2+</sup> .                                                                                |
| Figure S5 UV–Vis absorption diagram of 5 μM DL for Cu <sup>2+</sup> recognition in DMSO/HEPES (v:v = 3:7, pH = 7.4) buffer solution.                     |
| Figure S6 The Job's plot curve for estimating the coordination ratio of the DL to Cu <sup>2+</sup> .                                                     |
| Figure S7 The Benesi Hildebrand diagram of 1/(F-F <sub>0</sub> ) and 1/[Cu <sup>2+</sup> ] with 1:1 coordination between probe DL and Cu <sup>2+</sup> . |
| Figure S8 <sup>1</sup> H NMR spectra of probe DL before and after recognition of Cu <sup>2+</sup> .                                                      |

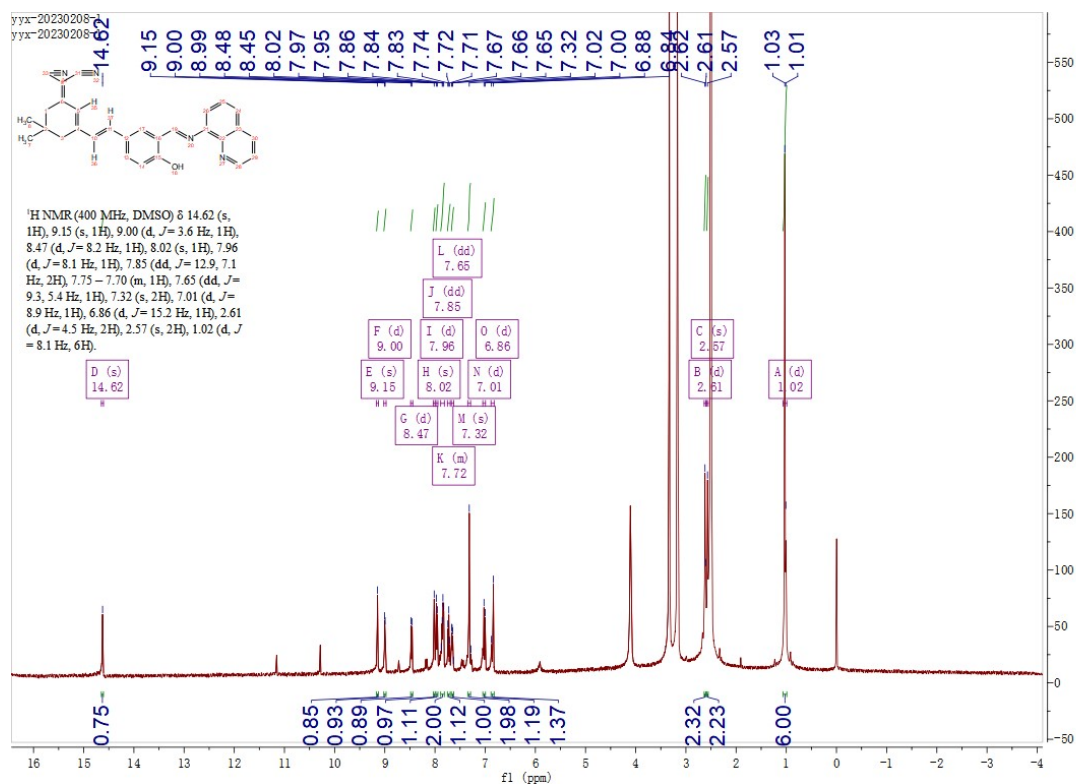

Figure S1 <sup>1</sup>H NMR spectrum of probe DL in DMSO-d<sub>6</sub>.

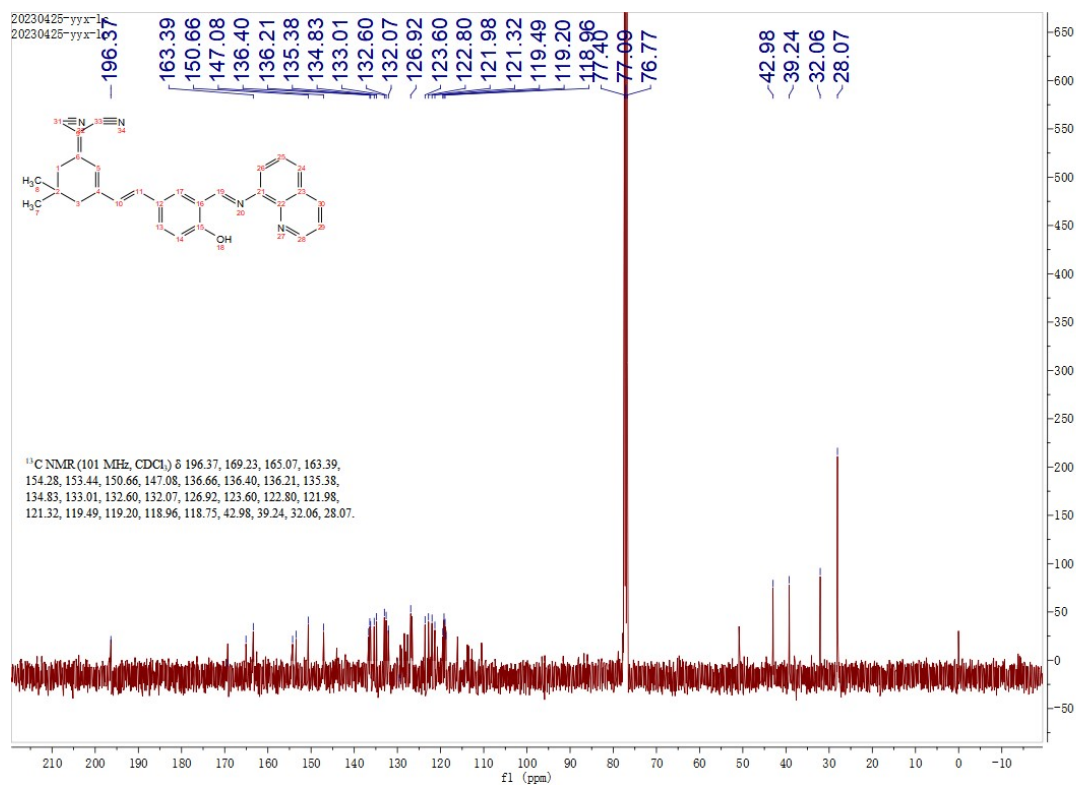

Figure S2 <sup>13</sup>C NMR spectrum of probe DL in CDCl<sub>3</sub>.

## Mass Spectrum SmartFormula Report

### Analysis Info

Analysis Name C:\Users\del\l\Desktop\YQB DL\_P1-B-4\_01\_31221.d  
 Method lc-ms4-hr-low.m  
 Sample Name YQB DL  
 Comment

Acquisition Date 2023/5/16 17:57:28

Operator zlwei  
 Instrument / Ser# micrOTOF-Q II 10351

### Acquisition Parameter

|             |          |                       |           |                  |           |
|-------------|----------|-----------------------|-----------|------------------|-----------|
| Source Type | ESI      | Ion Polarity          | Positive  | Set Nebulizer    | 0.6 Bar   |
| Focus       | Active   | Set Capillary         | 4500 V    | Set Dry Heater   | 200 瘡     |
| Scan Begin  | 50 m/z   | Set End Plate Offset  | -500 V    | Set Dry Gas      | 8.0 l/min |
| Scan End    | 1200 m/z | Set Collision Cell RF | 100.0 Vpp | Set Divert Valve | Waste     |

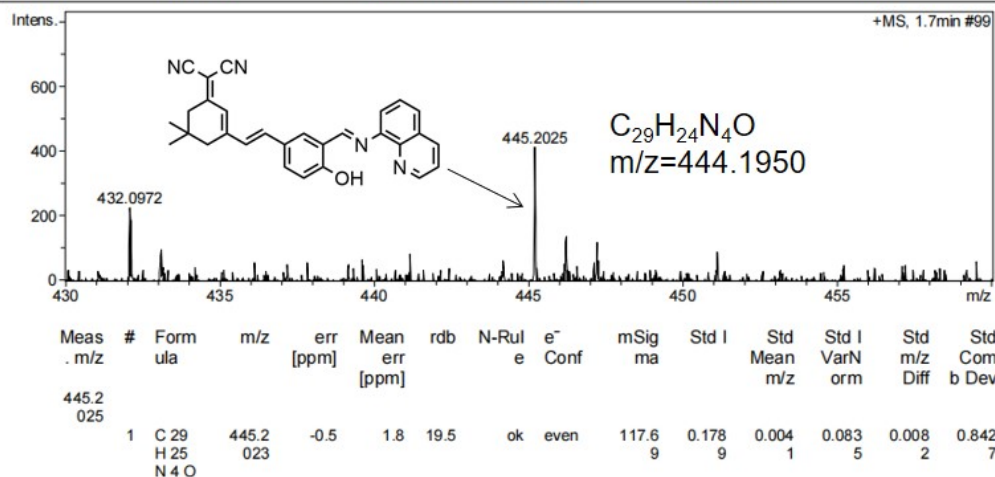

Figure S3 High-resolution mass spectra of the probe DL.

## Mass Spectrum SmartFormula Report

### Analysis Info

Analysis Name C:\Users\del\l\Desktop\YQB DL+CU\_P1-B-1\_01\_31218.d  
 Method lc-ms4-hr-low.m  
 Sample Name YQB DL+CU  
 Comment

Acquisition Date 2023/5/16 17:36:39

Operator zlwei  
 Instrument / Ser# micrOTOF-Q II 10351

### Acquisition Parameter

|             |          |                       |           |                  |           |
|-------------|----------|-----------------------|-----------|------------------|-----------|
| Source Type | ESI      | Ion Polarity          | Positive  | Set Nebulizer    | 0.6 Bar   |
| Focus       | Active   | Set Capillary         | 4500 V    | Set Dry Heater   | 200 瘡     |
| Scan Begin  | 50 m/z   | Set End Plate Offset  | -500 V    | Set Dry Gas      | 8.0 l/min |
| Scan End    | 1200 m/z | Set Collision Cell RF | 100.0 Vpp | Set Divert Valve | Waste     |

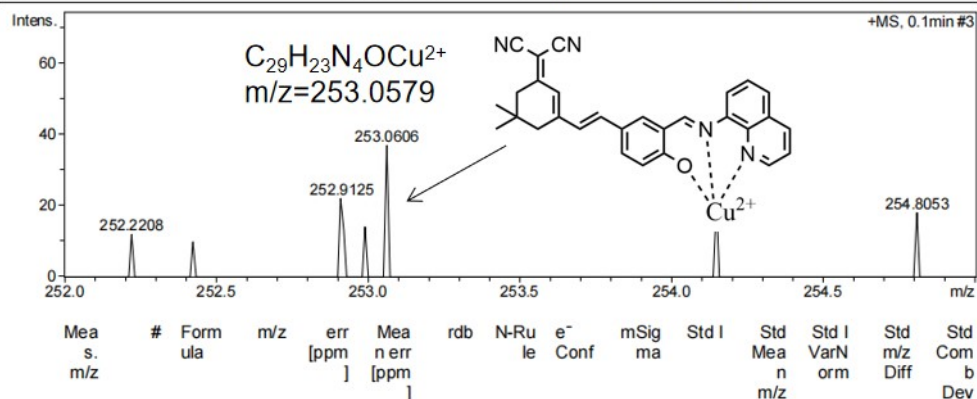

Figure S4 High-resolution mass spectra of the probe DL+Cu<sup>2+</sup>.

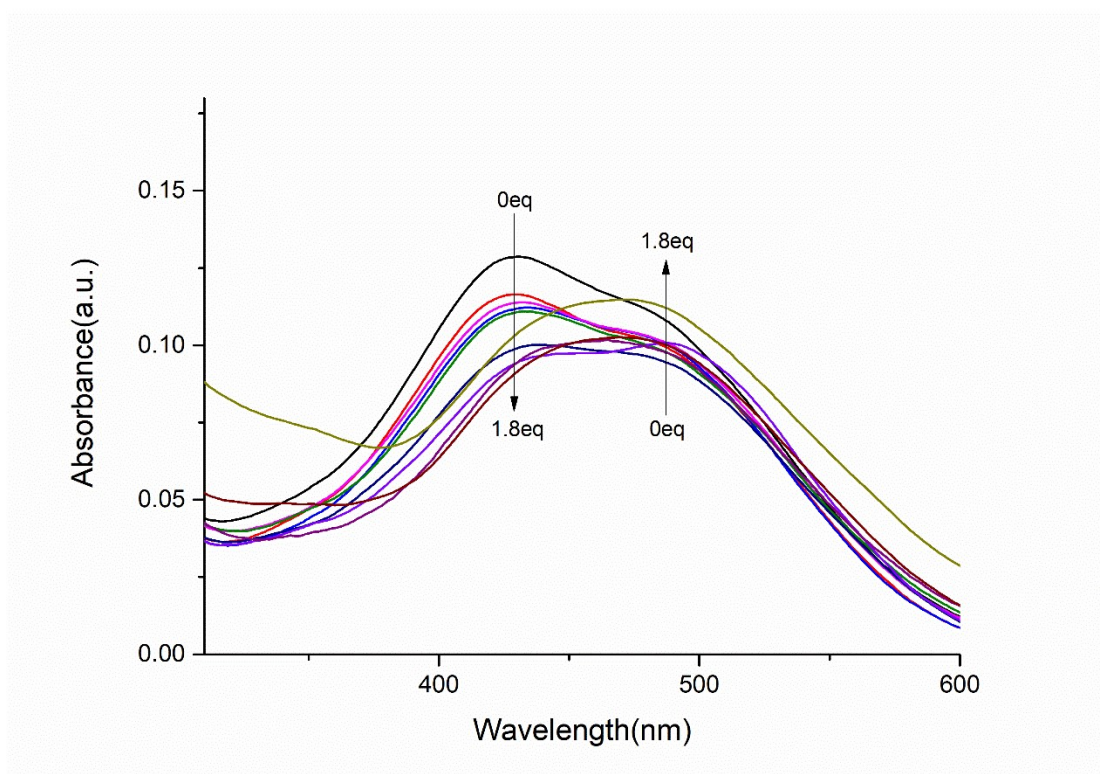

Figure S5 UV-Vis absorption diagram of 5  $\mu\text{M}$  DL for  $\text{Cu}^{2+}$  recognition in DMSO/HEPES (v:v = 3:7, pH = 7.4) buffer solution.

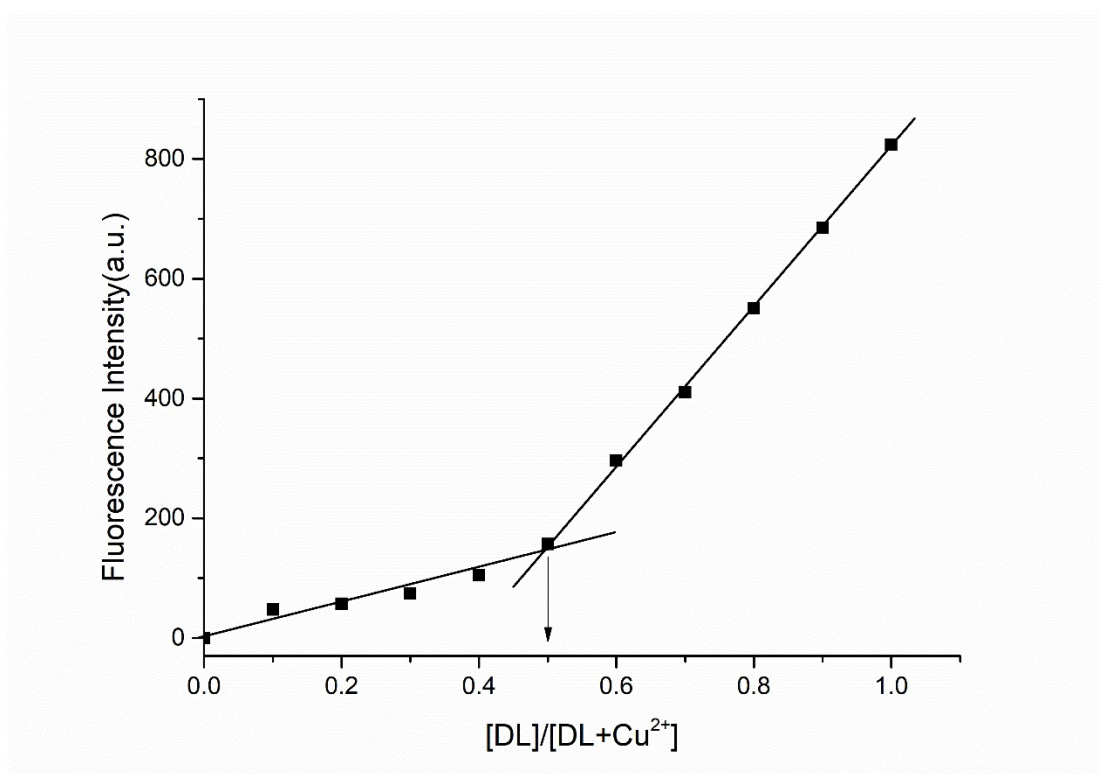

Figure S6 The Job's plot curve for estimating the coordination ratio of the DL to  $\text{Cu}^{2+}$ .

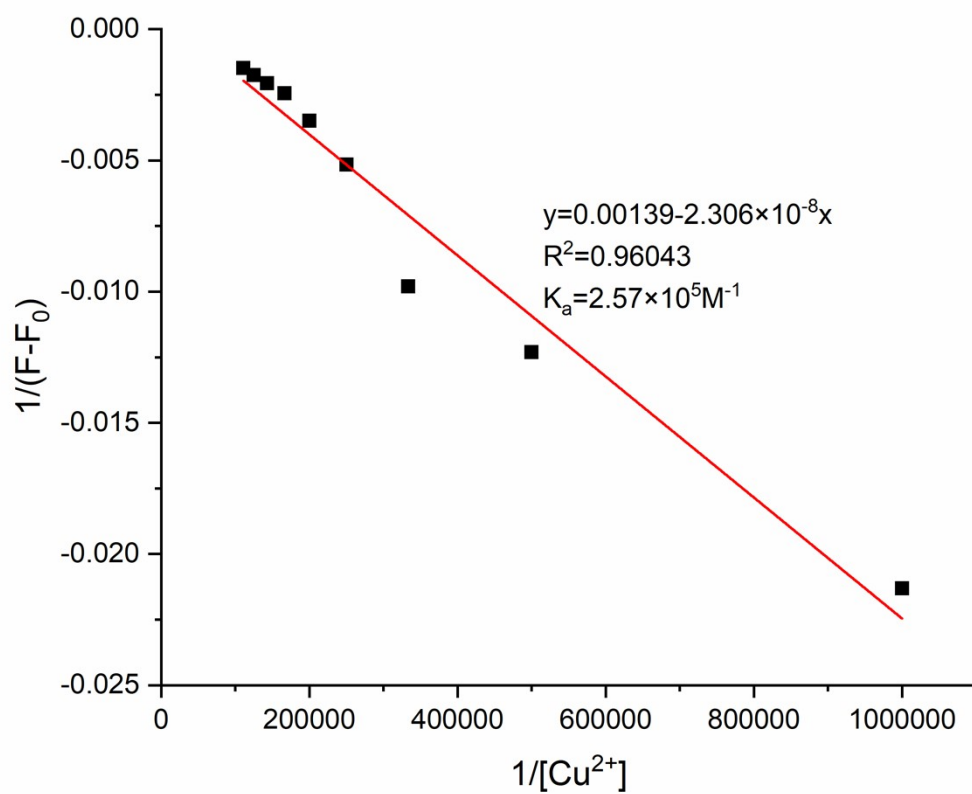

Figure S7 The Benesi Hildebrand diagram of  $1/(F-F_0)$  and  $1/[Cu^{2+}]$  with 1:1 coordination between probe DL and  $Cu^{2+}$ .

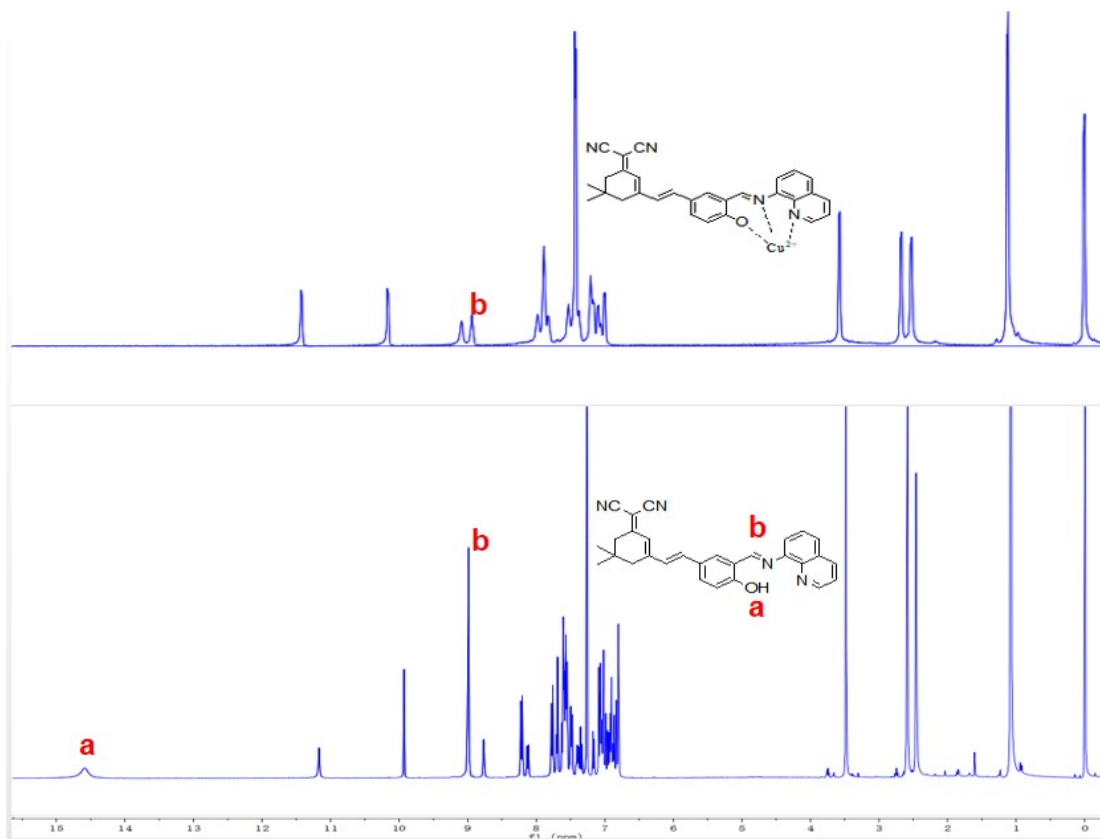

Figure S8  $^1\text{H}$  NMR spectra of probe DL before and after recognition of  $\text{Cu}^{2+}$ .
